# Supplementary material for: Angiotensinogen promoter methylation predicts bevacizumab treatment response of patients with recurrent glioblastoma
Source: PubMed Central journal article supplement (PMC7191184; doi:10.1002/1878-0261.12660), 2020-03-18

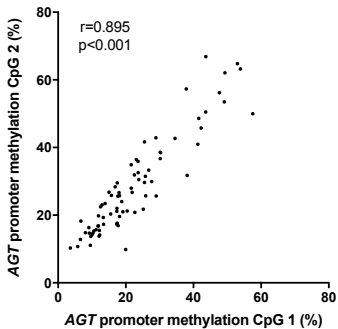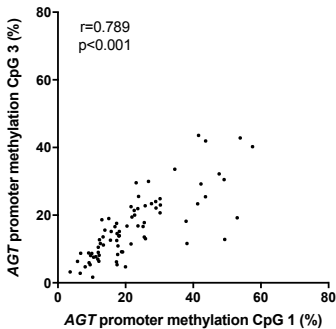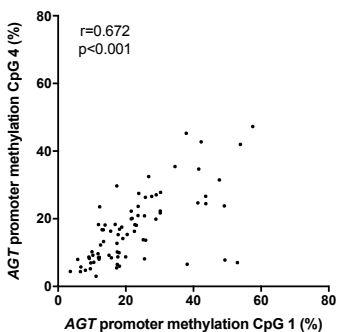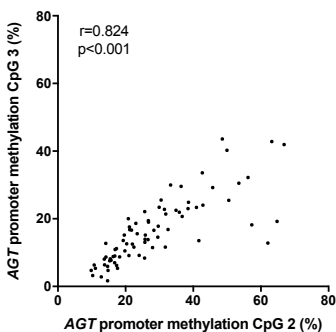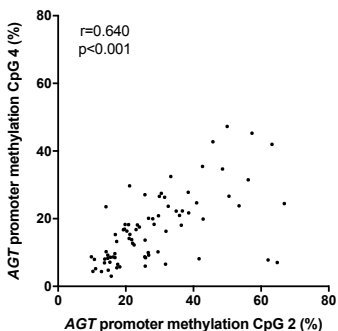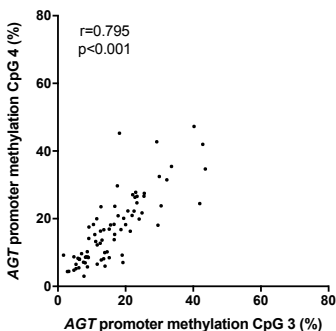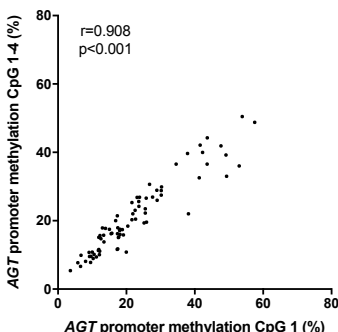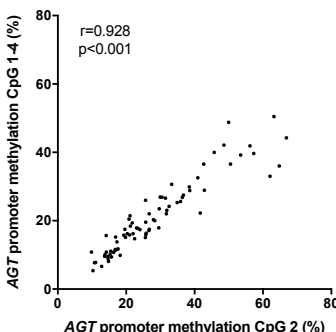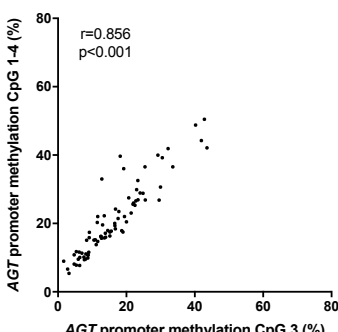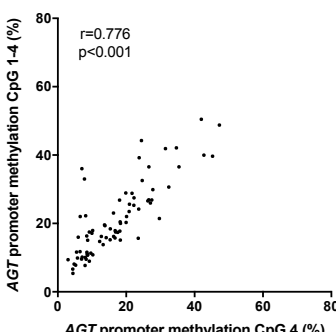

Supplement: MOL2-14-964-s003.pdf [file MOL2-14-964-s003.pdf]
